# Supplementary material for: Transcriptome Profiling and Physiological Studies Reveal a Major Role for Aromatic Amino Acids in Mercury Stress Tolerance in Rice Seedlings
Source: PLoS One. 2014 May 19;9(5):e95163. doi: 10.1371/journal.pone.0095163 (PMC4026224; doi:10.1371/journal.pone.0095163)
Supplement: Table S12 — Summary of Hg-specific upregulated genes. (XLSX) [file pone.0095163.s013.xlsx]

## Sheet: Table S12
Table S12 Summary of Hg-specific upregulated genes.
RAP-locus	TIGR	FC				Description
		25 μM Cd	25 μM Hg	5 μM Cu	10 μM juglone
Catalytic activity
Os01g0633500	LOC_Os01g44260	-1.36765	2.67203	-1.02225	-1.11274	dihydroflavonol-4-reductase, putative, expressed
Os02g0151300	LOC_Os02g05744	1.06867	2.29592	1.15944	1.04244	endoglucanase, putative, expressed
Defense response
Os12g0273300	LOC_Os12g17490	1.01161	2.09067	1.08017	-1.05779	stripe rust resistance protein Yr10, putative, expressed
Lipid metabolic process
Os01g0900400	LOC_Os01g67430	1.17872	2.1944	1.08601	-1.43355	Lipase, class 3 family protein.
Oxidation reduction
Os11g0119700	LOC_Os11g02710	1.19404	3.80784	1.10825	-1.57308	retrotransposon protein, putative, Ty1-copia subclass, expressed
Os07g0101000	LOC_Os07g01110	-1.72544	2.11525	-1.55782	-1.04644	laccase precursor protein, putative, expressed
Protein amino acid phosphorylation
Os03g0292700	LOC_Os03g18170	1.0572	2.12896	-1.32266	-1.54216	MAPKKK 73
Os01g0384300	LOC_Os01g28730	-1.07349	2.03511	1.09258	-1.2624	RKF3 protein kinase
Proteolysis
Os08g0527300	LOC_Os08g41550	-1.30266	2.44518	1.02242	-1.02502	ubiquitin carboxyl-terminal hydrolase, putative, expressed
Regulation of transcription
Os06g0221000	LOC_Os06g11780	-1.56644	2.87999	-1.31747	-1.18063	MYB-81
Transferase activity
Os12g0202700	LOC_Os12g10140	1.0256	2.11863	1.11671	1.0563	O-methyltransferase, putative, expressed
Os07g0503500	LOC_Os07g32020	-1.56847	2.0795	-1.13754	-1.03055	UDP-glucoronosyl and UDP-glucosyl transferase domain containing protein, expressed
Transport
Os08g0344600	LOC_Os08g25624	-1.03141	2.47511	1.05291	1.1897	phosphate/phosphate translocator, putative, expressed
Os07g0175600	LOC_Os07g07930	-1.3237	2.42934	1.04024	-1.04703	LTPL78 - Protease inhibitor/seed storage/LTP family protein precursor, expressed
Os05g0171300	LOC_Os05g07900	-1.21658	2.4467	1.12741	1.13227	mitochondrial carrier protein, putative, expressed
Others
Os01g0551000	LOC_Os01g37040	-1.92539	2.5717	-1.31809	-1.72377	retrotransposon protein, putative, Ty1-copia subclass, expressed
Os01g0731100	LOC_Os01g53090	-2.33819	2.00147	-1.51221	-1.44168	pathogen-related protein, putative, expressed
Os03g0136700	LOC_Os03g04390	-1.1291	2.23111	-1.39475	-1.18396	pentatricopeptide, putative, expressed
Os03g0237900	LOC_Os03g13480	1.06156	2.34619	-1.02003	-1.12642	cyclin-J18-like, putative, expressed
Os07g0240300	LOC_Os07g13590	-1.06186	2.42695	1.15686	-1.15797	Similar to OSIGBa0153E02-OSIGBa0093I20.13 protein
Os09g0368500	LOC_Os09g20284	-1.27851	2.46236	-1.22771	-1.13712	amine oxidase, flavin-containing, domain containing protein, expressed
Os09g0532000	LOC_Os09g36200	-1.35606	2.07521	1.02296	-1.29737	senescence-inducible chloroplast stay-green protein 1, putative, expressed
Os10g0567000	LOC_Os10g41749	-1.49242	2.10447	-1.0368	1.0546	crcB-like protein, expressed
Os07g0580900	LOC_Os07g39270	-1.22803	3.05346	1.12249	-1.02415	polyprenyl synthetase, putative, expressed
Unknown
Os07g0480300	LOC_Os07g29700	1.09464	2.86171	-1.00896	-1.13409	expressed protein
Os02g0159400	LOC_Os02g06460	-1.296	2.14278	1.1663	-1.29876	expressed protein
Os02g0216500	LOC_Os02g12490	1.04427	2.77605	1.0096	-1.13713	expressed protein
Os05g0209500	LOC_Os05g11900	1.12217	2.48691	1.14045	1.1025	expressed protein
Os11g0542800	LOC_Os11g34070	1.13867	2.38288	1.13556	-1.40928	hypothetical protein
Os11g0575900	LOC_Os11g36740	-1.18115	2.16803	-1.12887	-1.16137	DUF593 domain containing protein, expressed
